# Supplementary material for: Carboxy terminal modifications of the P0 protein reveal alternative mechanisms of nuclear ribosomal stalk assembly
Source: PubMed Central journal article supplement — Nucleic Acids Res. 2013 Jul 23;41(18):8628–36. doi: 10.1093/nar/gkt637 (PMC3794597; doi:10.1093/nar/gkt637), 2013-07-23
Supplement: supp_gkt637_nar-01346-a-2013-File008.pdf [file supp_gkt637_nar-01346-a-2013-File008.pdf]

Supplementary Data to

CARBOXY TERMINAL MODIFICATIONS OF THE P0 PROTEIN REVEAL  
ALTERNATIVE MECHANISMS OF NUCLEAR RIBOSOMAL STALK  
ASSEMBLY

Rosario Francisco-Velilla, Miguel Remacha, Juan P. G. Ballesta  
Centro de Biología Molecular Severo Ochoa, Consejo Superior de Investigaciones  
Científicas and Universidad Autónoma de Madrid, 28049 Madrid.

MATERIALS AND METHODS

| Table S1. Yeast strains used |                                                                          |             |
|------------------------------|--------------------------------------------------------------------------|-------------|
| Strain                       | Genotype                                                                 | Source      |
| W303-1B                      | <i>MATa ade2-1 his3-11,15 leu2-3,112 trp1-1 ura3-1 ade2-1, can1-100.</i> | (39)        |
| W303dGP0                     | as W303-1B but <i>RPP0::URA3-P<sub>GALI</sub>-RPP0</i>                   | (28)        |
| W303dM                       | as W303-1B but <i>MRT4::kanMX4</i>                                       | (12)        |
| W303dGP0dM                   | As W303-1B but <i>RPP0::URA3-P<sub>GALI</sub>-RPP0, MRT4::kanMX4</i>     | (12)        |
| W303D7-GFP                   | as W303-1B but <i>RPP0::RPP0D7-GFP/HIS3</i>                              | This report |
| D45                          | As W303 but <i>RPP2B::HIS3, RPP2A::URA3</i>                              | (25)        |
| D45dM                        | as D45 but <i>MRT4::natNT2</i>                                           | This report |
| AJY1539                      | <i>MATa his3Δ1 leu2Δ0 lys2Δ0 ura3Δ0 CRM1(T539C)-HA</i>                   | (40)        |
| AJY1539dM                    | as AJY1539 but <i>MRT4::kanMX4</i>                                       | (12)        |
| W303Nop7-TAP                 | as W303-1A but <i>NOP7::NOP7-TAP/TRP1</i>                                | (12)        |
| W303dMNop7-TAP               | as W303Nop7-TAP but <i>MRT4::KanMX4</i>                                  | (12)        |
| D45Nop7-TAP                  | as D45 but <i>NOP7::NOP7-TAP/TRP1</i>                                    | This report |
| D45dMNop7-TAP                | as D45 Nop7-TAP but <i>MRT4::natNT2</i>                                  | This report |

| Table S2. Plasmids used |                                        |
|-------------------------|----------------------------------------|
| Plasmid                 | Description                            |
| pFLhisP0-C              | (16)                                   |
| pFLhisP0D7              | (16)                                   |
| pFL37Mrt4/P0            | (13)                                   |
| pFL37P0ΔAB              | (24)                                   |
| YCplac111-Mrt4-eGFP     | (12)                                   |
| YCplac111-P0-eGFP       | (12)                                   |
| pUG23-eEFG              | Prof. J. H. Hegemann, Düsseldorf Univ. |
| pUG23P0-C-GFP           | This report                            |
| pFL36P0-C-GFP           | This report                            |
| pUG23P0ΔAB-GFP          | This report                            |
| pFL36P0ΔAB-GFP          | This report                            |
| pFL36P0D7-GFP           | This report                            |
| pUG23Mrt4/P0-GFP        | This report                            |
| pFL36Mrt4/P0-GFP        | This report                            |
| pFL39-P2A               | (41)                                   |
| p2B35DU                 | (27)                                   |
| PYM44                   | (18)                                   |

| Table S3. Oligonucleotides used to construct new plasmids |        |                                       |                   |                                                                        |
|-----------------------------------------------------------|--------|---------------------------------------|-------------------|------------------------------------------------------------------------|
| Construct                                                 | Vector | Template                              | Oligonucleotide   | Sequence                                                               |
| P0-CGFP                                                   | pUG23  | pUG23-P0                              | 5' P0XbaIGFP      | 5'ATTCTAGATGACTAGGTTATGAAC3'                                           |
|                                                           |        |                                       | 3'P0-C-BamHI-GFP  | 5'AAGGATCCAGCTGGAGCAGCG3'                                              |
|                                                           | pFL36  | pUG23-P0-CGFP                         | 5'P0XbaIGFP       | 5'ATTCTAGATGACTAGGTTATGAAC3'                                           |
|                                                           |        |                                       | 3'GFPSacI         | 5'TTGAGCTCTTATTTGTACAATTCATCCAT3'                                      |
| P0ΔAB-GFP                                                 | pUG23  | pBSP0ΔAB                              | 5' P0XbaIGFP      | 5'ATTCTAGATGACTAGGTTATGAAC3'                                           |
|                                                           |        |                                       | 3'P0BamHI-TAP-GFP | 5'AAGGATCCATCGAATAAACCGAA3'                                            |
|                                                           | pFL36  | pUG23-P0ΔABCGFP                       | 5' P0XbaIGFP      | 5'ATTCTAGATGACTAGGTTATGAAC3'                                           |
|                                                           |        |                                       | 3'GFPSacI         | 5'TTGAGCTCTTATTTGTACAATTCATCCAT3'                                      |
| Mrt4/P0-GFP                                               | pUG23  | pFL37-Mrt4/P0                         | 5'XbaIP0GFP       | 5'ATTCTAGATGACTAGGTTATGAAC3'                                           |
|                                                           |        |                                       | 3'P0BamHI-TAP-GFP | 5'AAGGATCCATCGAATAAACCGAA3'                                            |
|                                                           | pFL36  | pUG23-Mrt4/P0GFP                      | 5'XbaIP0GFP       | 5'ATTCTAGATGACTAGGTTATGAAC3'                                           |
|                                                           |        |                                       | 3'GFPSacI         | 5'TTGAGCTCTTATTTGTACAATTCATCCAT3'                                      |
| P0D7-GFP                                                  | pFL36  | <i>S.cerevisiae</i> D7GFP Genomic DNA | 5' P0XbaIGFP      | 5'ATTCTAGATGACTAGGTTATGAAC3'                                           |
|                                                           |        |                                       | 3'EcoRVGFP        | 5'TTGATATCTTTGTACAATTCATCC3'                                           |
| NAT/Mrt4 deletion cassette                                |        | pYM17                                 | 5'MRT4-nat        | 5'TACATCACTGTATCGTCCATAAAAAGATTATTATAGTTGAATCATGGGTACCACTCTTGAGGACAC3' |
|                                                           |        |                                       | 3'MRT4-nat        | 5'TATACAATGGTCTATTAATAAAAAGGCTTCCAAATAATAGTTCAGCTTTAGGGGCAGGGCATGCT3'  |

## RESULTS

### *Unusual mobility of the GFP-tagged P0 derivatives in SDS-PAGE.*

As shown in Figures 1, 4 and S6, the truncated P0-C-GFP and P0ΔAB-GFP proteins unexpectedly migrated to positions higher than that seen for wild-type P0-GFP, even though the PCR DNA fragment encoding the tagged proteins subcloned in the final vector was of the expected relative size (Fig. S1) and the final constructs were confirmed by DNA sequence. These unexpected results must be due to the different original plasmids used as sources for eGFP: Ycplac111 for wild-type P0 and pUG23 for the truncated proteins. This resulted in amino acid stretches of different lengths linking the protein to GFP, which probably affected differently protein mobility.

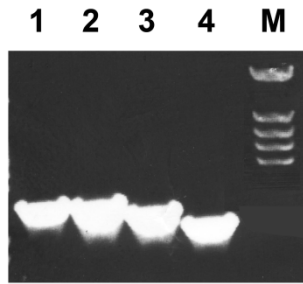

Figure S1. PCR DNA fragments obtained for each tagged protein, which were subsequently cloned into the indicated vector to construct the plasmids used in the Nop7-TAP protein complex purification tests. 1) P0GFP in Ycplac111; 2) P0-C-GFP in pFL36; 3) P0 $\Delta$ AB-GFP in pFL36; 4) P0D7-GFP in pFL36. M, size markers.

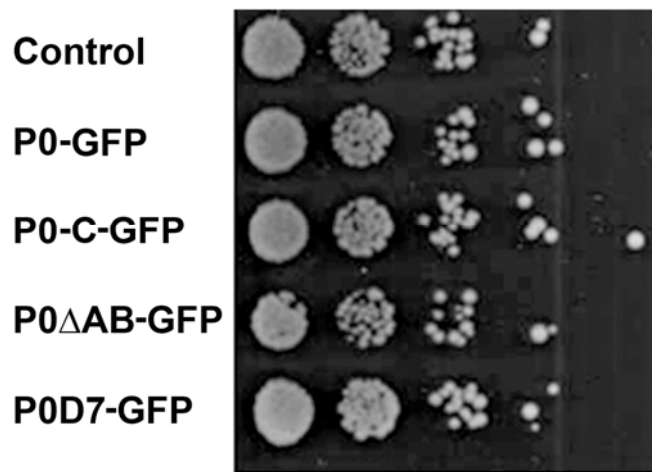

Figure S2. Effect of GFP-tagged P0 truncated proteins on cell growth in *S. cerevisiae*. Serial dilutions of *S. cerevisiae* AJY1539 transformed to express the indicated truncated P0 proteins plated in rich medium and incubated at 30° C for 4 days.

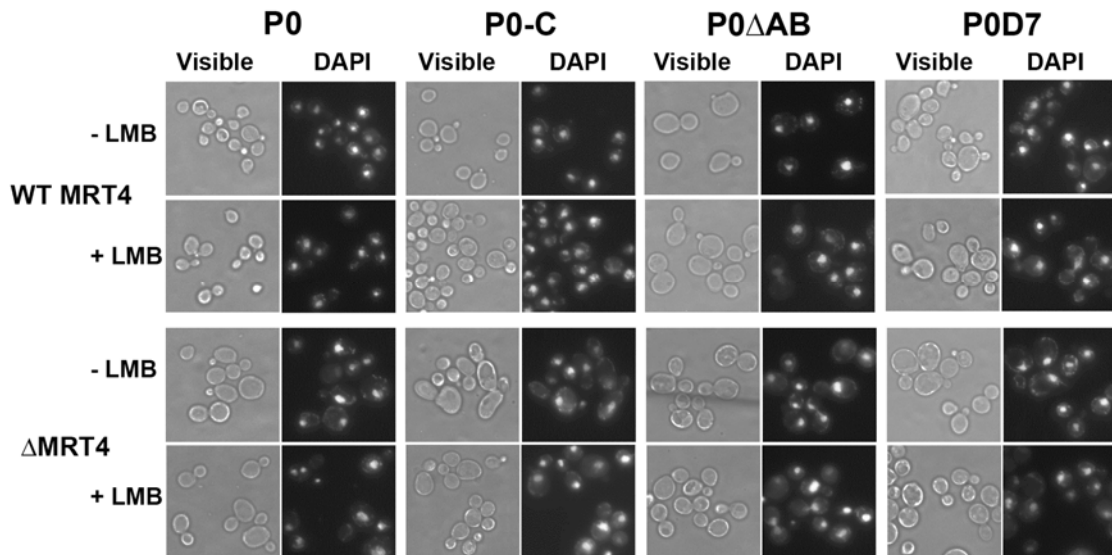

Figure S3. Nuclear location as determined by DAPI staining in cells expressing the GFP-tagged P0 derivatives. The same cell samples of *S. cerevisiae* AJY1539 (WT MRT4) and AJY1539dM ( $\Delta$ MRT4) expressing the indicated GFP-tagged proteins in the presence and in the absence of LMB shown in Fig. 2 were identified under brightfield illumination and DAPI staining.

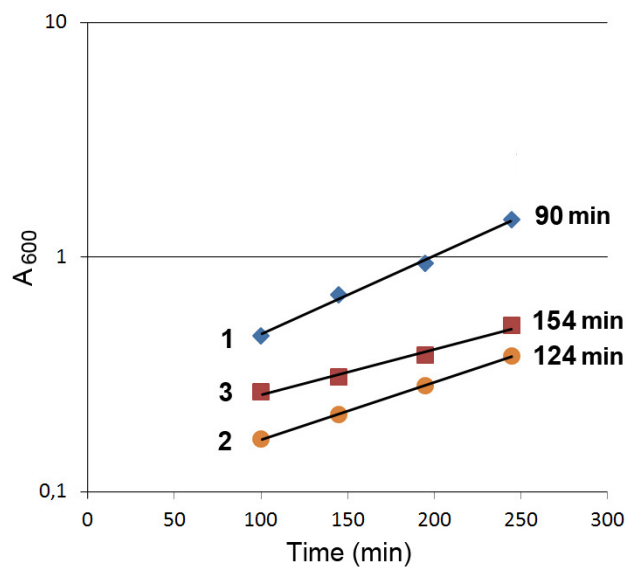

Fig S4. Effect of protein P0D7 on growth rate of a MRT4-deleted yeast strain. *S. cerevisiae* AJY1539dM (3) lacking protein Mrt4 was transformed to express protein P0D7 (2). Both strains, together with the parental AJY1539 (1) as a control were grown in rich liquid medium to estimate the growth rate. The estimated doubling times are indicated.

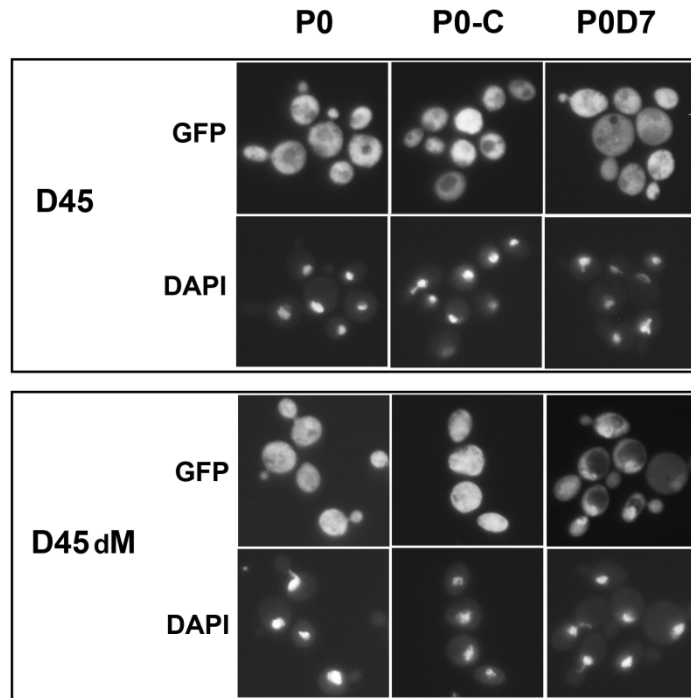

Figure S5. Cellular location of fluorescent P0, P0-C and P0D7 proteins in strains D45 and D45dM. D45 lacks the stalk proteins P1 and P2, and its derivative strain D45dM also lacks Mrt4, and they were transformed using plasmids encoding the indicated GFP-tagged proteins stained with DAPI. Green fluorescence (GFP) and the DAPI stained nuclei are shown in the upper and lower row for each panel.

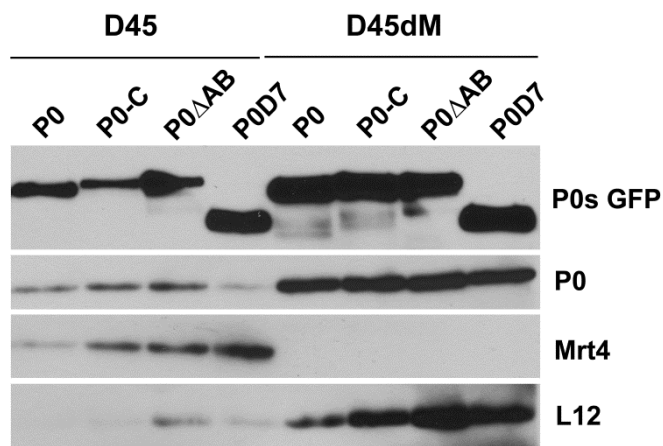

Figure S6. Analysis of Nop7-TAP particles from the D45 *S. cerevisiae* strains. The particles purified from the strains indicated were processed as described in Fig. 4.

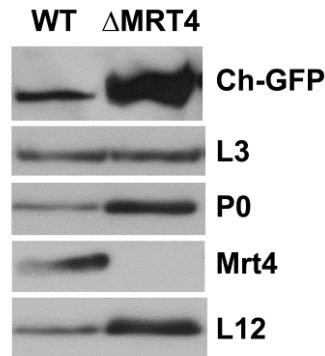

Figure S7. Presence of the Mrt4/P0 chimeric protein in nuclear Nop7-TAP pre-ribosomal particles. Purified particles from parental AJY1539 (WT) and MRT4-deleted AJY1539dM ( $\Delta$ MRT4) were processed as described in Fig. 4 and Mrt4/P0 was identified at the expected position in western blots using an anti-Mrt4 serum.

## References

12. Rodríguez-Mateos, M., García-Gómez, J.J., Francisco-Velilla, R., Remacha, M., de la Cruz, J. and Ballesta, J.P. (2009) Role and dynamics of the ribosomal protein P0 and its related trans-acting factor Mrt4 during ribosome assembly in *Saccharomyces cerevisiae*. *Nucleic Acids Res*, **37**, 7519-7532.
13. Rodríguez-Mateos, M., Abia, D., García-Gómez, J.J., Morreale, A., de la Cruz, J., Santos, C., Remacha, M. and Ballesta, J.P. (2009) The amino terminal domain from Mrt4 protein can functionally replace the RNA binding domain of the ribosomal P0 protein. *Nucleic Acids Res*, **37**, 3514-3521.
16. Santos, C. and Ballesta, J.P.G. (1995) The highly conserved protein P0 carboxyl end is essential for ribosome activity only in the absence of proteins P1 and P2. *J. Biol. Chem.*, **270**, 20608-20614.
24. Cárdenas, D., Revuelta-Cervantes, J., Jiménez-Díaz, A., Camargo, H., Remacha, M. and Ballesta, J.P.G. (2012) P1 and P2 protein heterodimer binding to the p0 protein of *Saccharomyces cerevisiae* is relatively non-specific and a source of ribosomal heterogeneity. *Nucleic Acids Res*, **40**, 4520-4529.
25. Remacha, M., Santos, C., Bermejo, B., Naranda, T. and Ballesta, J.P.G. (1992) Stable binding of the eukaryotic acidic phosphoproteins to the ribosome is not an absolute requirement for *in vivo* protein synthesis. *J. Biol. Chem.*, **267**, 12061-12067.
37. Santos, C. and Ballesta, J.P. (1994) Ribosomal protein P0, contrary to phosphoproteins P1 and P2, is required for ribosome activity and *Saccharomyces cerevisiae* viability. *J. Biol. Chem.*, **269**, 15689-15696.
39. Thomas, T.J. and Rothstein, R. (1989) Elevated recombination rates in transcriptionally active DNA. *Cell*, **56**, 619-630.
40. Hedges, J., West, M. and Johnson, A.W. (2005) Release of the export adapter, Nmd3p, from the 60S ribosomal subunit requires Rpl10p and the cytoplasmic GTPase Lsg1p. *EMBO J*, **24**, 567-579.
41. Zambrano, R., Briones, E., Remacha, M. and Ballesta, J.P.G. (1997) Phosphorylation of the acidic ribosomal P proteins in *Saccharomyces cerevisiae*. A reappraisal. *Biochemistry*, **36**, 14439-14446.
